# Supplementary material for: Effects of different thickening agents on infant gut microbiota
Source: Royal Society of Chemistry journal article supplement (doi:10.1039/c7fo01992k), 2018-01-01
Supplement: c7fo01992k1.pdf [file c7fo01992k1.pdf]

**Supplementary Table 1.-** *Chromatographic conditions*

**Supplementary Table 2.-** *Short chain fatty acids (acetate, propionate and butyrate) quantification at 5, 8, 10, 24 and 48h, in faecal donor 3. Different letters (a,b,c,d) denote significant differences ( $p < 0.05$ ) between different times (h) within the same ingredient and measurement (Molar proportions, ratio A:P, and total molar concentration). Different numbers (1,2,3) denote differences in total molar concentration, between different ingredients, within the same time.*

**Supplementary Figure 1.-** *Total gas production (KPa) per ingredient and donor. Results have been presented as average  $\pm$  S.D. Different letters (a,b,c) denote significant differences between different ingredients within the same donor. For the same ingredient, different numbers (1,2,3) denote significant differences between different donors. Significance level  $p < 0.05$ .*

**Supplementary Figure 2.-** *pH evolution per ingredient and donor. Results have been presented as average  $\pm$  S.D. Different letters (a,b,c) denote significant differences between different ingredients within the same sampling time and donor. Significance level  $p < 0.05$ .*

**Supplementary Figure 3.-** *Evolution of increments of Enterococcus genome equivalents logarithm per mL with time of fermentation, per ingredient and donor. Results have been presented as average  $\pm$  S.D. For each donor, different letters (a,b,c,d) denote significant differences between ingredients within the same time. Per*

*each donor and ingredient, Pearson's correlation coefficients for the variation of bacterial DNA quantification in relation to time, are presented in annexed table. Significance level  $p < 0.05$ .*

**Supplementary Figure 4.-** *Evolution of increments of Enterobacteriaceae genome equivalents logarithm per mL with time of fermentation, per ingredient and donor. Results have been presented as average  $\pm$  S.D. For each donor, different letters (a,b,c,d) denote significant differences between ingredients within the same time. Per each donor and ingredient, Pearson's correlation coefficients for the variation of bacterial DNA quantification in relation to time, are presented in annexed table. Significance level  $p < 0.05$ .*
