# Supplementary material for: Effects of different thickening agents on infant gut microbiota
Source: Royal Society of Chemistry journal article supplement (doi:10.1039/c7fo01992k), 2018-01-01
Supplement: c7fo01992k5.pdf [file c7fo01992k5.pdf]

# Enterobacteriaceae

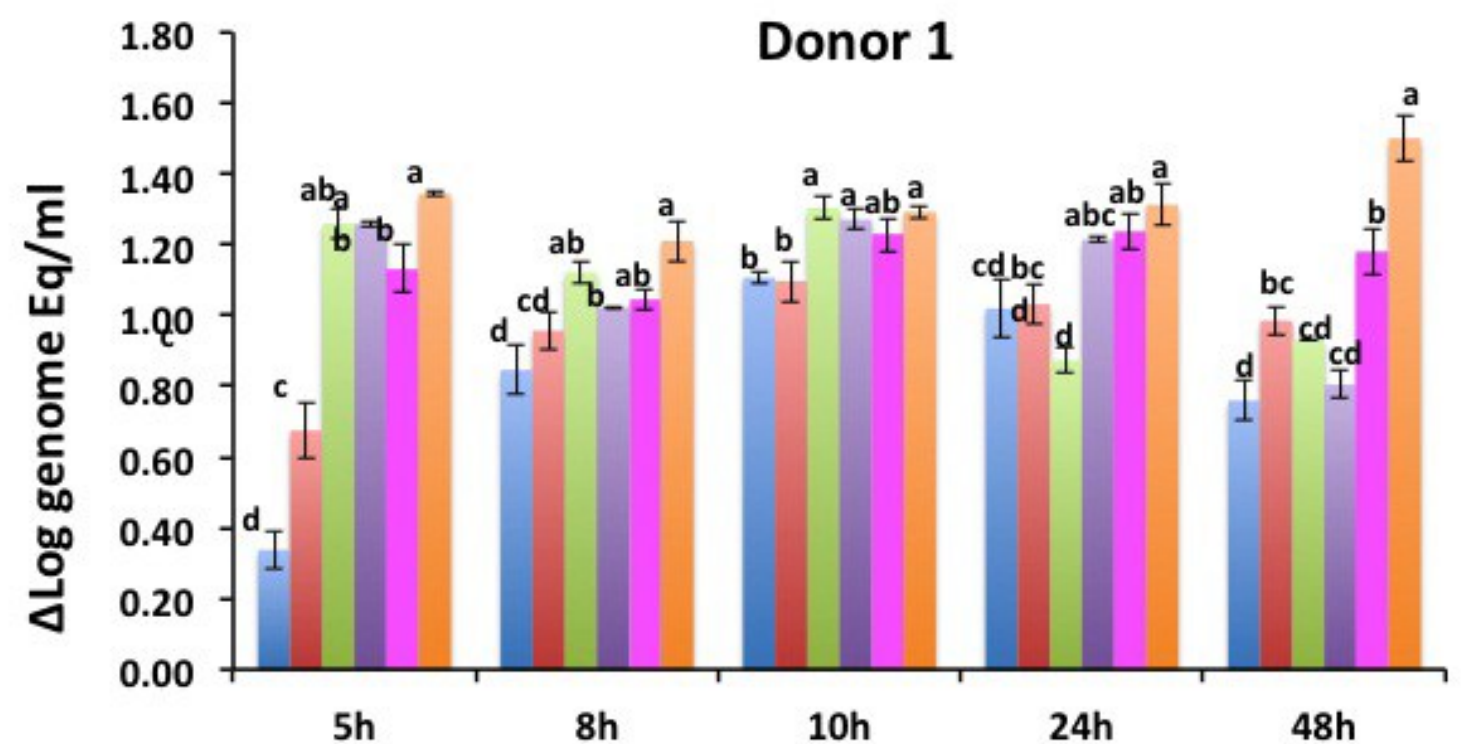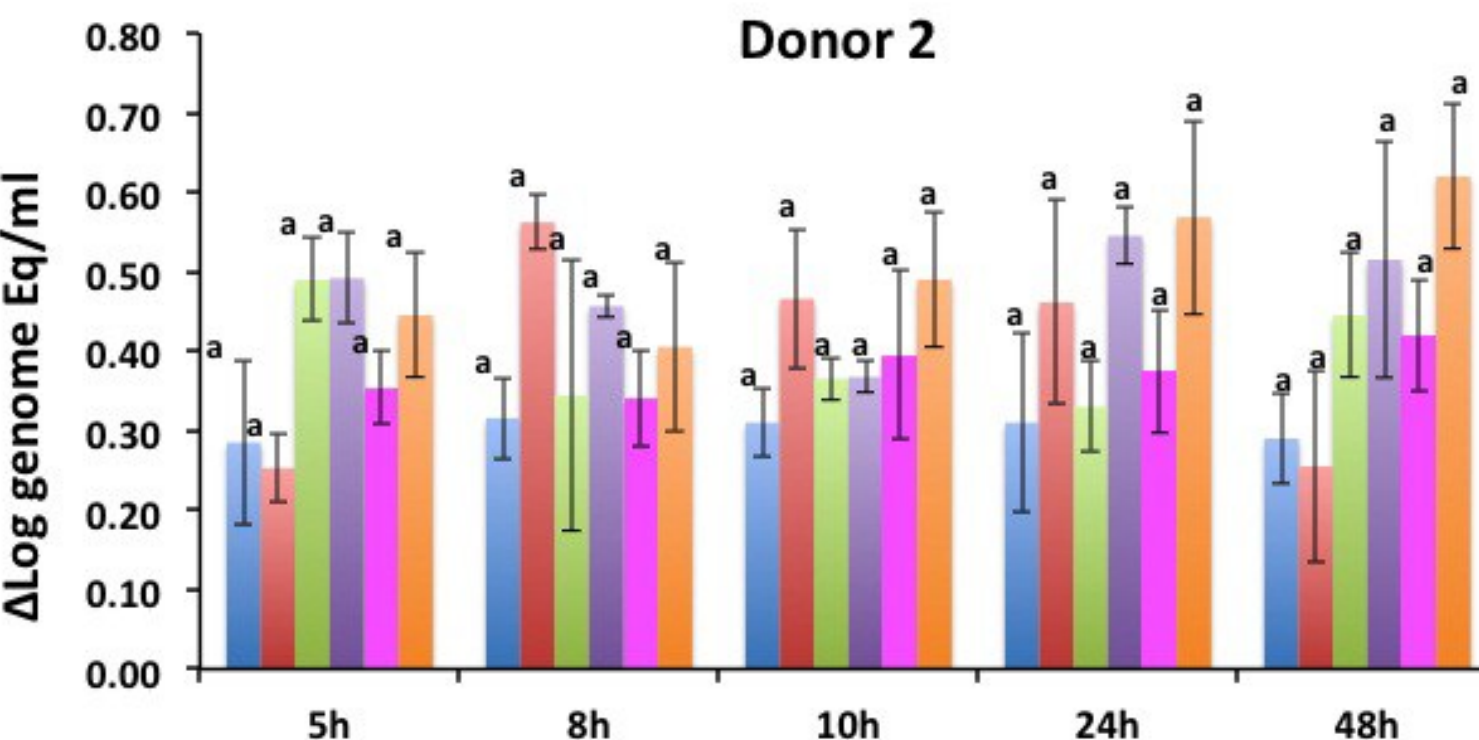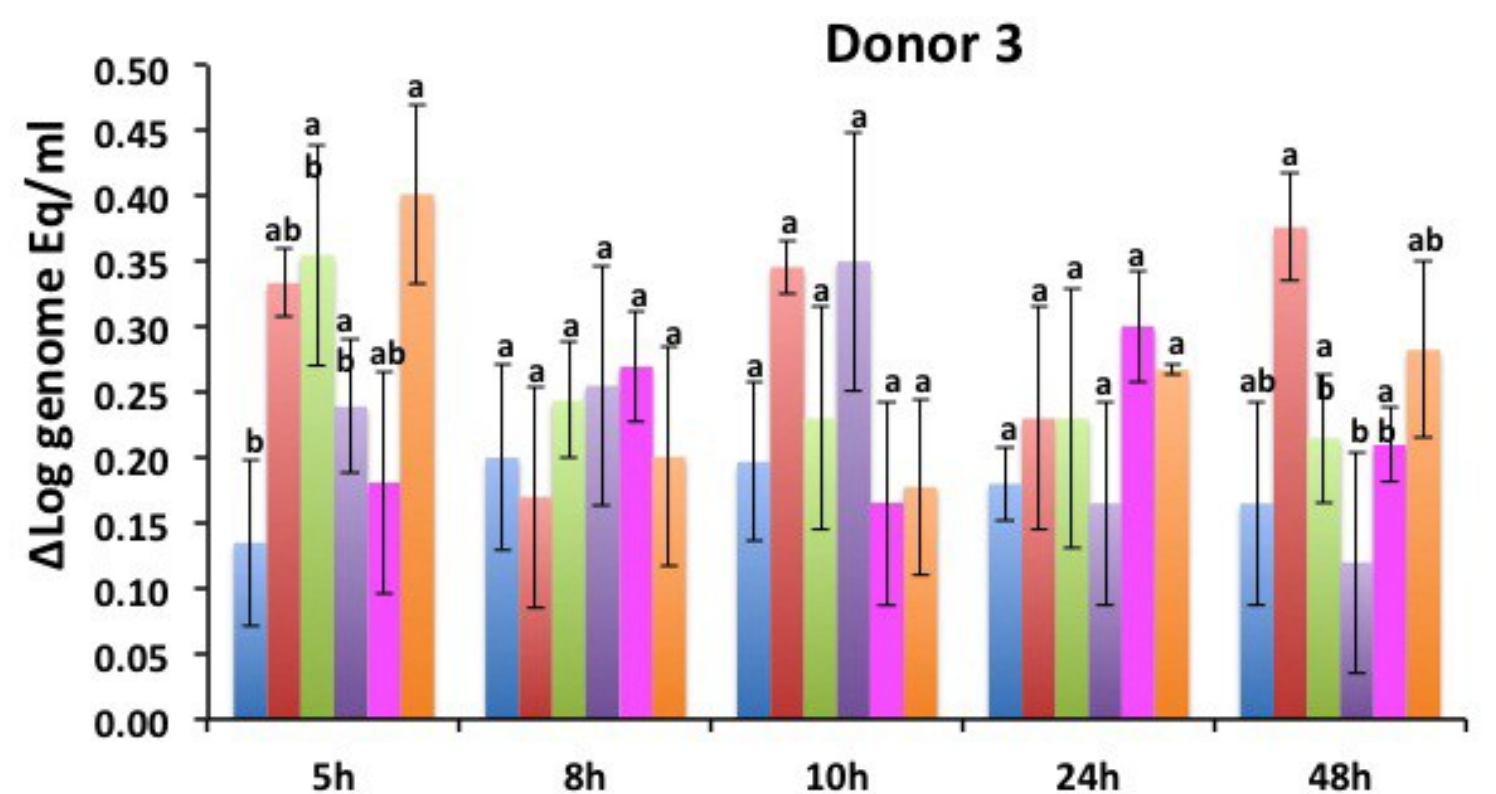

Pearson's correlation coefficients

|           | Donor 1 | Donor 2 | Donor 3 |
|-----------|---------|---------|---------|
| MBM       | 0.529   | 0.012   | 0.112   |
| LBG       | 0.659*  | -0.095  | 0.225   |
| Mhdp      | -0.739* | -0.157  | -0.561  |
| "gRS"     | -0.558  | 0.236   | -0.461  |
| Inulin    | 0.499   | 0.389   | 0.190   |
| D-glucose | 0.574   | -0.696  | -0.273  |

\*p<0.05
